# Supplementary material for: The INO80 chromatin remodeler sustains metabolic stability by promoting TOR signaling and regulating histone acetylation
Source: PubMed Central journal article supplement (PMC5834206; doi:10.1371/journal.pgen.1007216), 2018-02-20

# S10 Fig

**A.**

| Significant Biological Process Gene Ontology           |
|--------------------------------------------------------|
| negative regulation of Ras protein signal transduction |
| intracellular signal transduction                      |
| threonine biosynthetic process                         |
| endocytosis                                            |
| mitochondrion inheritance                              |
| mitochondrial DNA replication                          |
| regulation of GTPase activity                          |
| cellular amino acid biosynthetic process               |
| intracellular protein transport                        |
| mitochondria-nucleus signaling pathway                 |
| small GTPase mediated signal transduction              |

**B.**

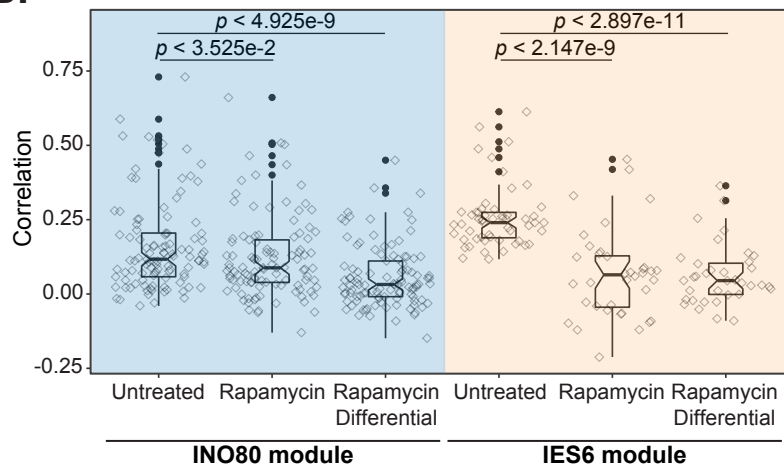

Supplement: pgen.1007216.s010.pdf [file pgen.1007216.s010.pdf]
