# Supplementary material for: The INO80 chromatin remodeler sustains metabolic stability by promoting TOR signaling and regulating histone acetylation
Source: PubMed Central journal article supplement (PMC5834206; doi:10.1371/journal.pgen.1007216), 2018-02-20

# S12 Fig

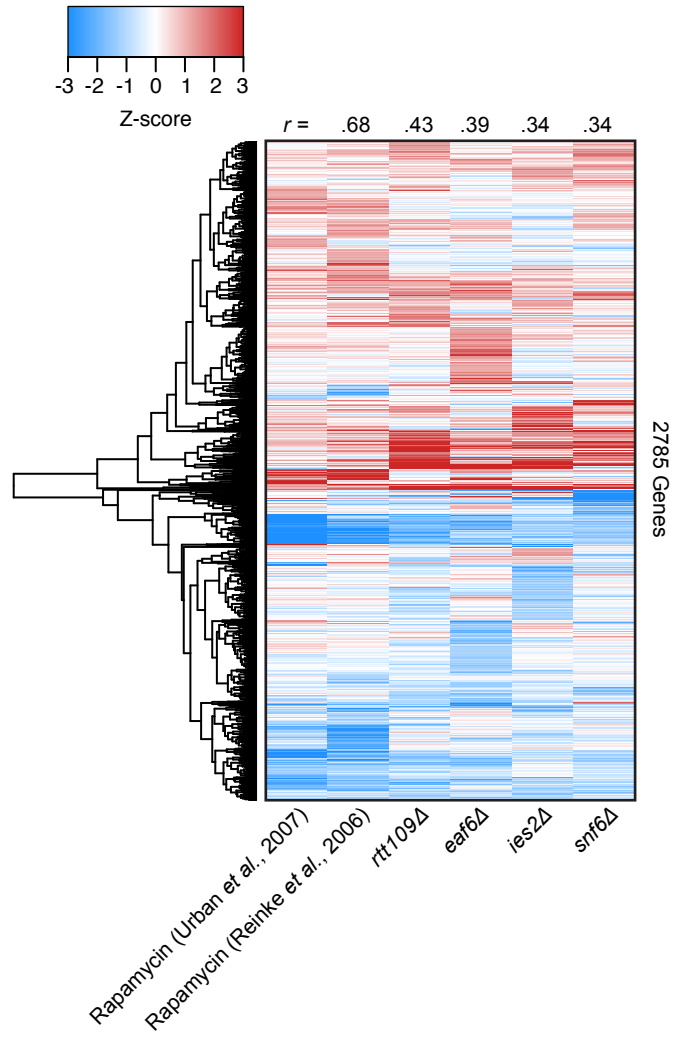

Supplement: pgen.1007216.s012.pdf [file pgen.1007216.s012.pdf]
